# Supplementary material for: Mapping SARS-CoV-2 Antibody Epitopes in COVID-19 Patients with a Multi-Coronavirus Protein Microarray
Source: PubMed Central journal article supplement (PMC8549749; doi:10.1128/spectrum.01416-21), 2021-10-27
Supplement: spectrum01416-21_supp_1_seq10.pdf [file spectrum01416-21_supp_1_seq10.pdf]

1  
2  
3  
4  
5  
6

**Mapping SARS-CoV-2 Antibody Epitopes in COVID-19 Patients with a  
Multi-Coronavirus Protein Microarray**

**Supplemental Figures**

7 Figure S1  
8

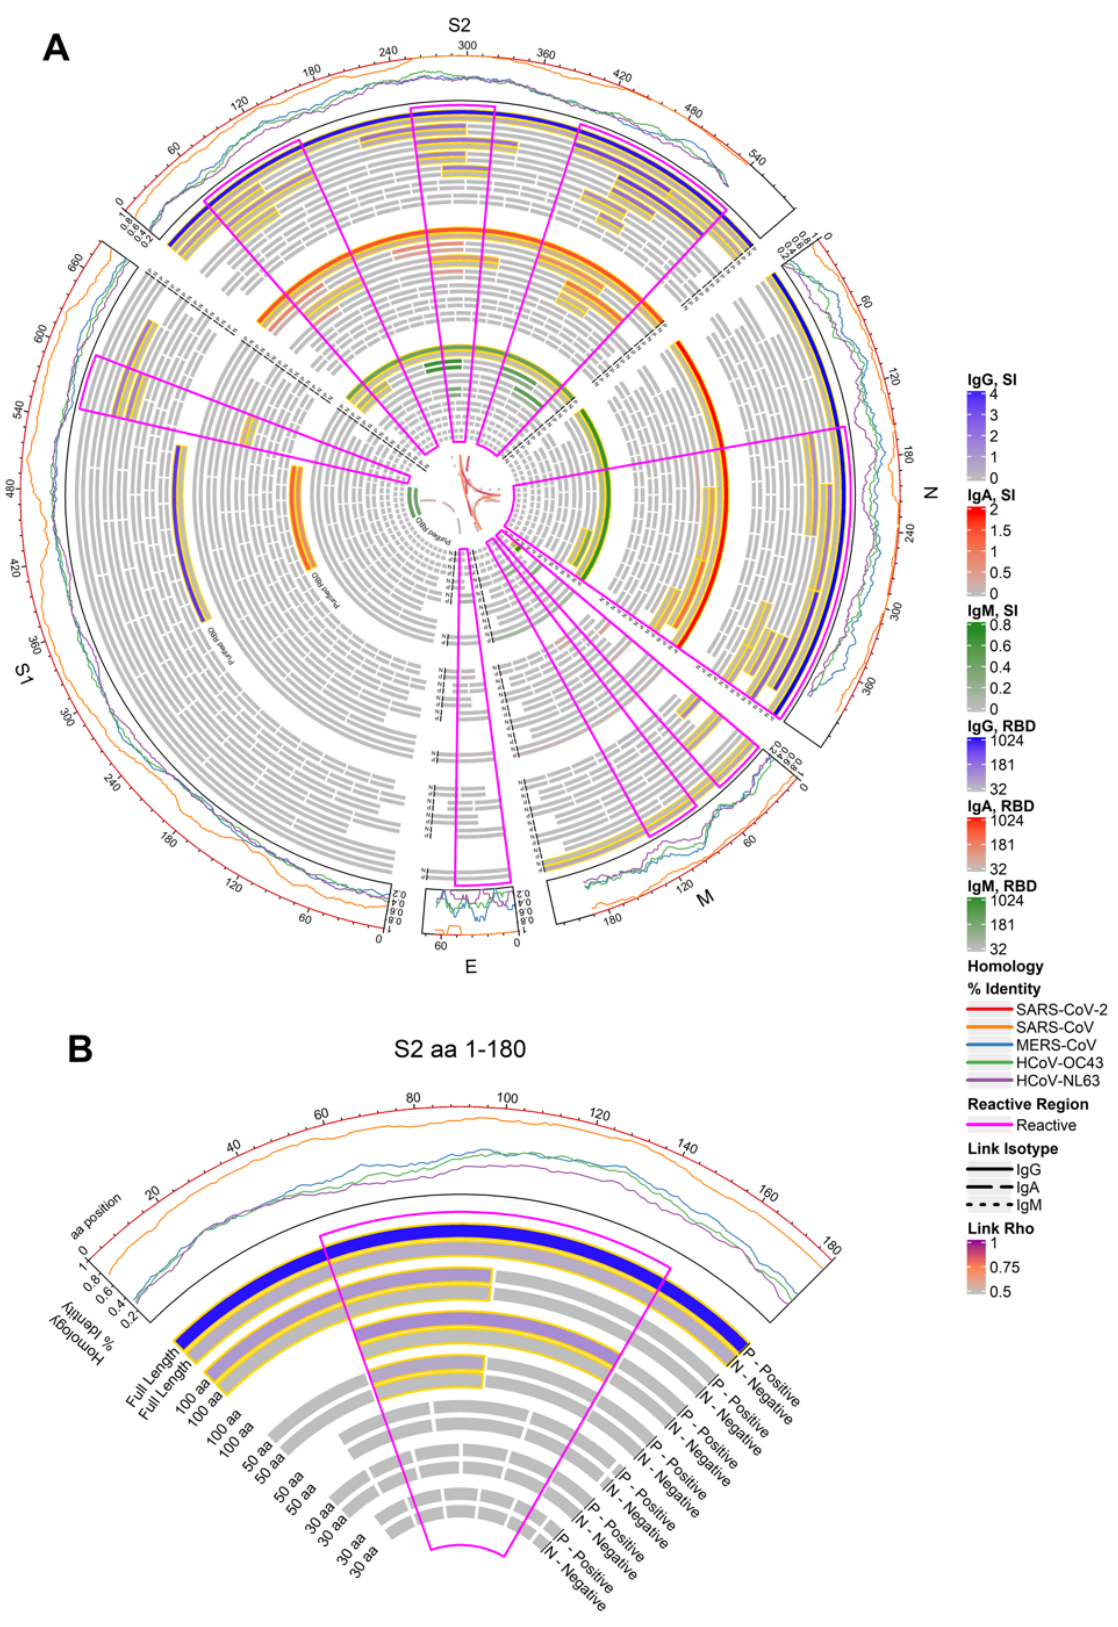

10 **Figure S1. Reactivity of COVID-19 patient and healthy donor IgG (outer band of bars), IgA**  
11 **(middle band) and IgM (inner band) to SARS-CoV-2 proteins and protein fragments. (A)** The  
12 circular graphic maps the amino acid (aa) position of SARS-CoV-2 fragments, showing a heat  
13 map of antibody levels in each group for overlapping regions of different aa length. Proteins are  
14 indicated outside the circle plot followed by a line graph showing the sequence homology of other  
15 CoVs with SARS-CoV-2 for each gene. Proteins and protein fragments produced *in vitro* are  
16 indicated by bars and show length and position of each fragment in each protein. Each fragment  
17 is drawn twice and shows group mean normalized  $\log_2$  signal intensity of antibody binding to each  
18 fragment for COVID-19 patient samples (P) and negative control sera (N). The purified receptor  
19 binding domain (RBD) is additionally shown for comparison. Signal intensity is shown by color  
20 gradients: IgG (grey to blue), IgA (grey to red), and IgM (grey to green). Bar pairs shown with gold  
21 outline represent significantly differential antibody binding between COVID-19 patients and  
22 healthy controls, defined as a mean  $\log_2$  signal intensity  $\geq 0.1$  in at least one group and a t-  
23 test  $p$  value  $\leq 0.05$ . The regions of greatest reactivity for each protein are outlined in magenta.  
24 Some fragments in E and M proteins that meet the reactivity threshold (grey) and are better  
25 visualized by individual responses as shown in Fig. S3. The Pearson's correlation coefficients  
26 ("Rho") between each full-length protein for each isotype are shown as links between protein  
27 sectors in the center of the circle (IgG: solid links, IgA: dashed, IgM: dotted). **(B)** A slice of the  
28 circular graphic is amplified and labeled in more detail as a guide to interpreting the full figure.  
29 The first 180 aa sequence of S2 is shown for IgG only.

30  
31  
32

33 **Figure S2**

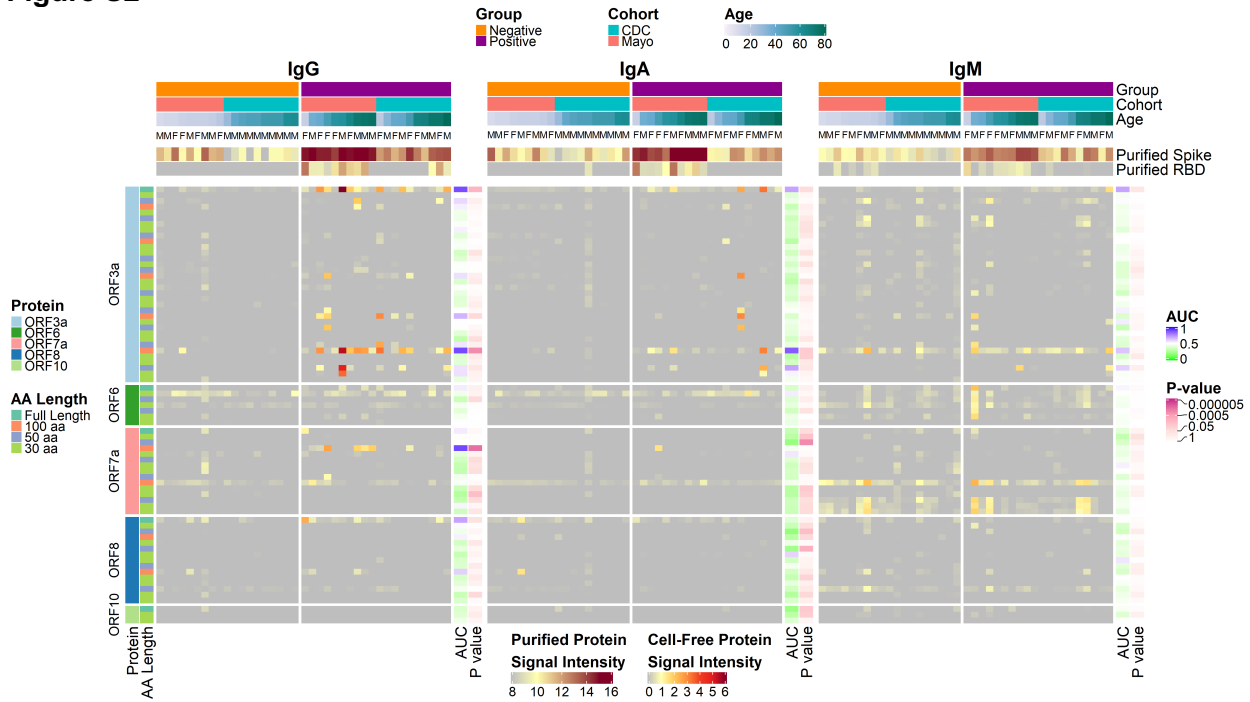

34

35 **Figure S2. Reactivity in COVID-19 patient and healthy donor IgG (left heatmap), IgA (middle**  
 36 **heatmap) and IgM (right heatmap) to SARS-CoV-2 nonstructural proteins and protein**  
 37 **fragments produced *in vitro*.** The heatmaps present the signals of individual array spots for the  
 38 nonstructural SARS-CoV-2 proteins produced by IVTT. Columns represent serum samples, and  
 39 rows represent IVTT proteins and protein fragments (n=34 ORF3a, n=7 ORF6, n=15 ORF7a,  
 40 n=15 ORF8, n=3 ORF10). Antibody signal intensity to cell-free expressed proteins and fragments  
 41 is shown on a color scale from grey to red. Sample information is overlaid above the heatmaps  
 42 and includes sex (M/F), group (Negative or Positive), cohort (CDC or Mayo) and age (years), as  
 43 well as the responses to purified S and RBD proteins on a separate color scale. Protein/fragment  
 44 information is annotated to the left of the heatmaps and includes the full-length protein name and  
 45 the amino acid length of the protein fragments ("AA Length", as full length, 100, 50 or 30 aa).  
 46 Proteins are ordered by the starting amino acid position for each fragment. For each isotype, the  
 47 receiver operating characteristic area under the curve (AUC) and the unadjusted t-test *p* value  
 48 between negatives and positives are shown to the right of each heatmap.

49

50 **Figure S3**

100 aa Fragments  
50 aa Overlap

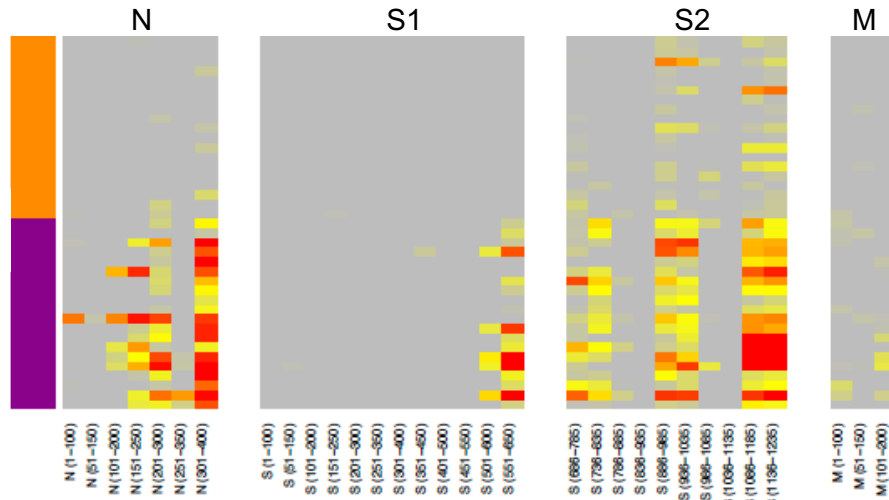

51  
52

50 aa Fragments  
25 aa Overlap

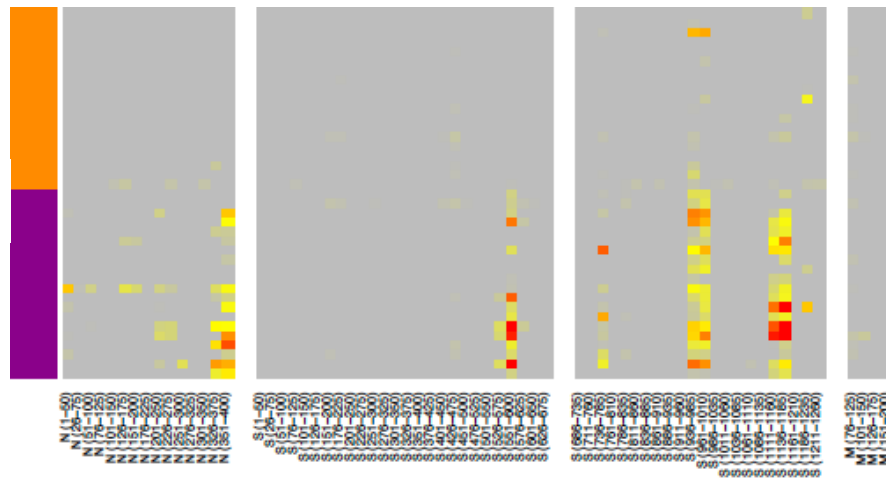

53  
54

30 aa Fragments  
15 aa Overlap

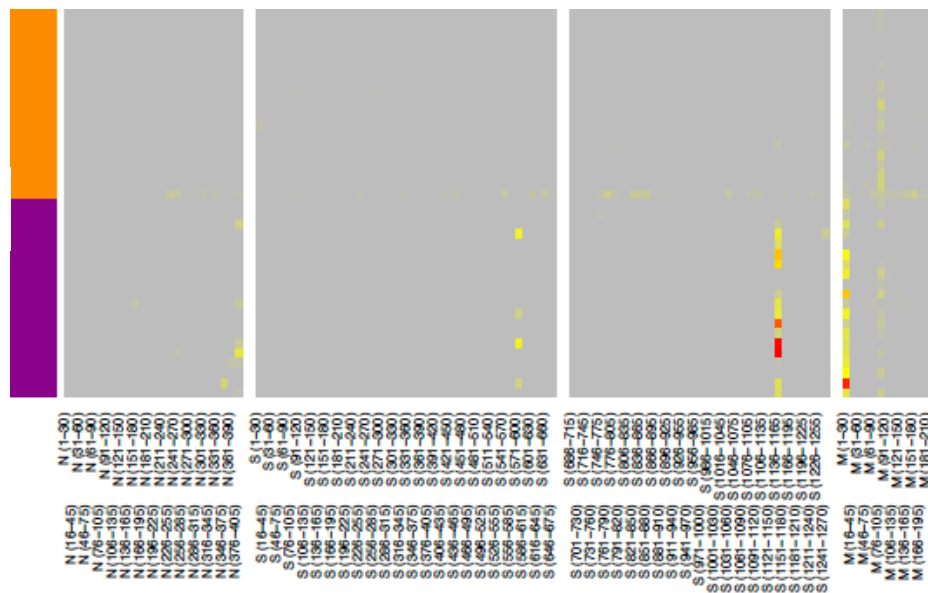

55

56  
57

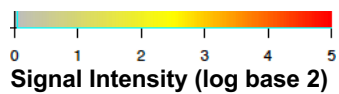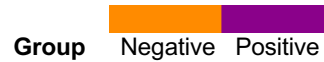

58 **Figure S3. COVID-19 patient IgG reactivity with SARS-CoV-2 N, S and M protein fragments**  
59 **arranged in amino acid sequence order.** Heat maps show the IgG reactivity of each serum  
60 sample separately in each row. Columns denote each protein fragment as labeled; the 30 aa  
61 fragment labels are staggered to save space. A scale shows the meaning of the colors. Bars at  
62 left of each heat map identify the samples: orange indicates negative control samples and purple  
63 shows COVID-19 positive samples. Amino acid numbers indicate the positions of the fragments  
64 in each protein.  
65  
66

67 **Figure S4**  
68

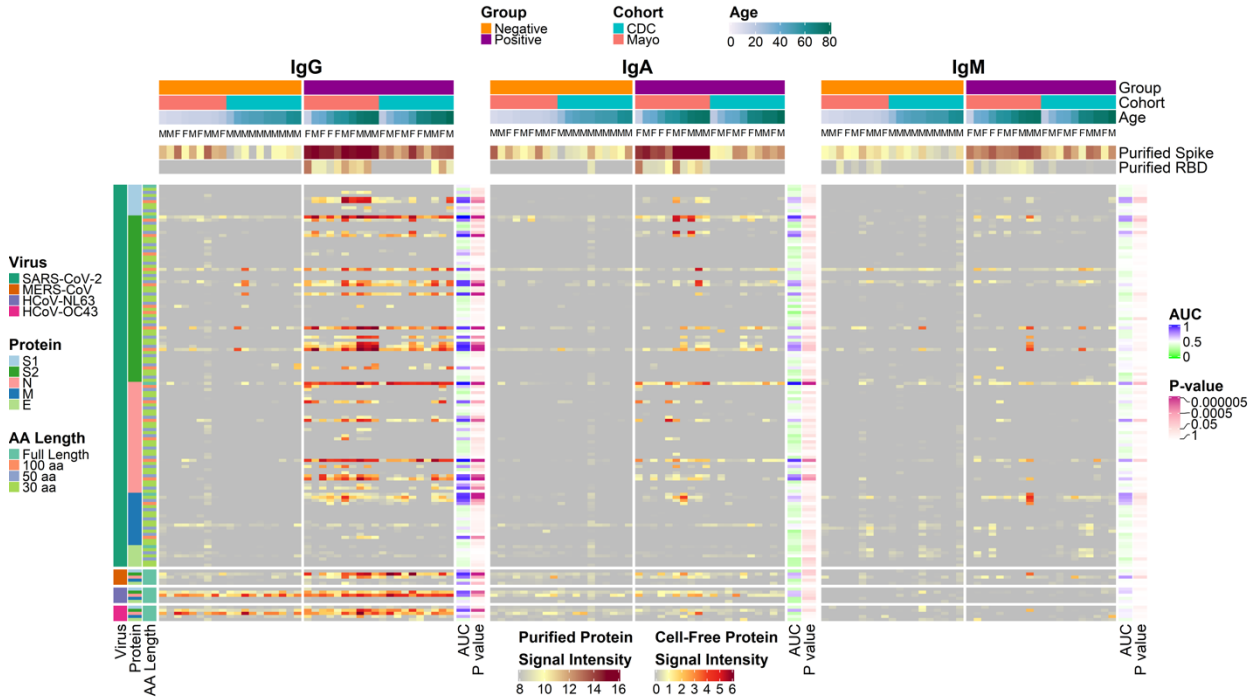

69  
70  
71 **Figure S4. Reactivity in COVID-19 positive and negative IgG (left heatmap), IgA (middle**  
72 **heatmap) and IgM (right heatmap) to SARS-CoV-2 and other HCoV proteins and protein**  
73 **fragments produced *in vitro*.** The heatmaps present the signals of antibody binding to individual  
74 proteins and protein fragments within the antigenic regions of SARS-CoV-2, as well as the full-  
75 length structural proteins of MERS-CoV, HCoV-NL63 and HCoV-OC43, for individual samples.  
76 Columns represent serum samples ordered by increasing age within group and cohort, and rows  
77 represent proteins or protein fragments; 128 SARS-CoV-2 proteins or fragments, five proteins  
78 each of MERS-CoV, HCoV-OC43 and HCoV-NL63. Antibody signal intensity to cell-free  
79 expressed proteins and fragments is shown on a color scale from grey to red. Sample information  
80 is overlaid above the heatmaps and includes sex (M/F), group (Negative or Positive), cohort (CDC  
81 or Mayo) and age (years), as well as the responses to purified S and RBD proteins on a separate  
82 color scale. Protein/fragment information is annotated to the left of the heatmaps and includes the  
83 virus, full-length protein name and the amino acid length of the protein fragments (“AA Length”,  
84 as full length, 100, 50 or 30 aa). For each isotype, the receiver operating characteristic area under  
85 the curve (AUC) and the unadjusted t-test *p* value between negatives and positives are shown to  
86 the right of each heatmap.

87  
88  
89  
90  
91  
92

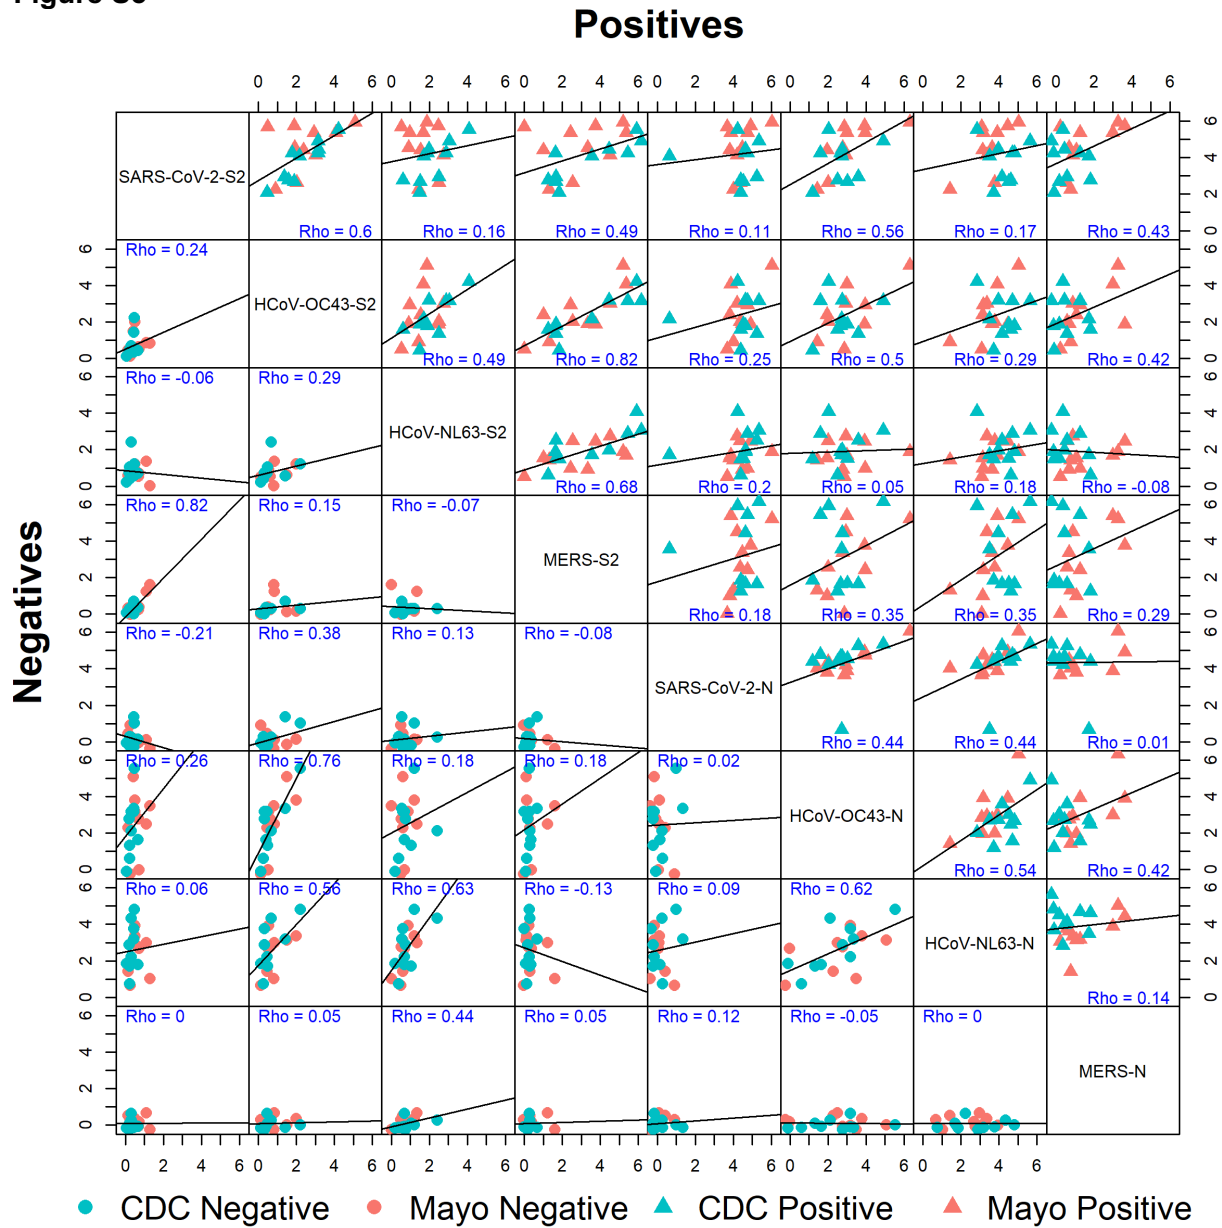

94  
95  
96  
97  
98  
99  
100  
101  
102  
103

**Figure S5. Correlation between IgG responses to SARS-CoV-2 and other human coronavirus N and S2 proteins.** The correlation matrix shows the Pearson’s correlation coefficient (“Rho”, blue) between IgG normalized signal intensity to SARS-CoV-2, MERS-CoV, HCoV-OC43 and HCoV-NL63 N and S2 full-length proteins produced *in vitro*. The lower half of the diagonal shows correlation between proteins in the negative group (circles), and the upper half of the diagonal shows the positive group correlations (triangles). Rho values and a linear regression line are overlaid on each comparison.



104 **Figure S6**

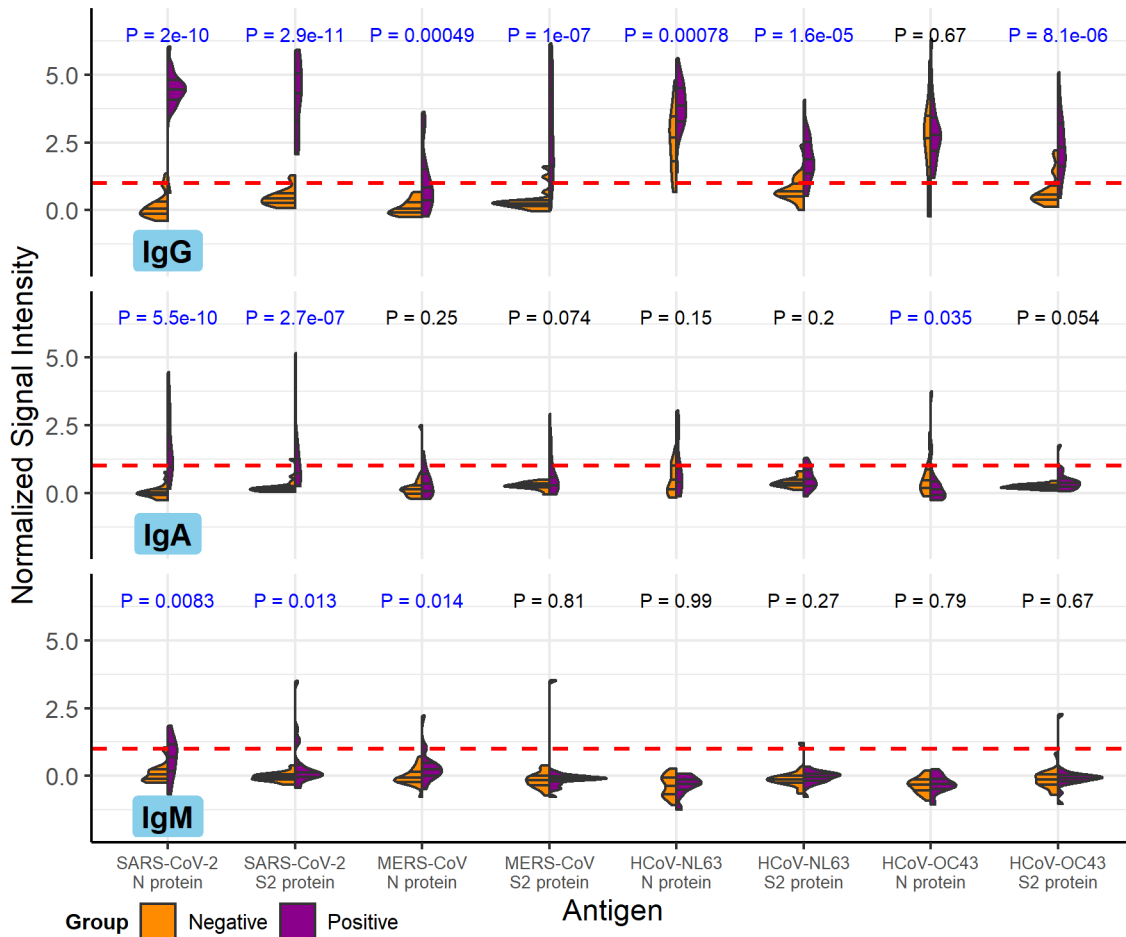

105

106

107

108 **Figure S6. Differential reactivity between IgG, IgA and IgM responses to SARS-CoV-2 and**

109 **other human coronavirus N and S2 proteins.** The results show the differential reactivity

110 between IgG, IgA and IgM normalized signal intensity to SARS-CoV-2, MERS-CoV, HCoV-OC43

111 and HCoV-NL63 N and S2 full-length proteins produced *in vitro* on a log scale, base 2. The split

112 violin plot shows the normalized signal intensity distribution of each of the IVTT N and S2 proteins.

113 Within each half-violin are three lines representing the interquartile range and the median. Above

114 each split violin is the Wilcoxon rank sum *p* value, colored blue for significant *p* values below 0.05.

115 The red dashed line represents the 1.0 seropositivity cutoff; values below the line represent non-

116 specific binding to the *E. coli* expression system. The healthy control negative group is shown on

117 the left violin halves in orange, and the COVID-19 patient positive group is shown in the right violin

118 halves in purple.

119
